# Supplementary material for: Influence of measurement errors on the results of the Brutsaert–Nieber analysis of flow recession curves
Source: Copernicus journal article supplement (doi:10.5194/hess-2018-413), 2018-08-24
Supplement: Supplementary file [file hess-2018-413-AC3-supplement.pdf]

$$\Theta = \frac{\frac{dQ}{dt} \frac{\Delta Q}{\Delta t}}{\frac{dQ}{dt}} \quad (7)$$

the bias for the linear reservoir after introducing Eq. (4) and assuming that the derivative of flow is calculated in the center of the time interval  $\Delta t$  yields:

$$\Theta = 1 - \frac{\frac{Q_0 e^{-a(t+\Delta t)} - Q_0 e^{-at}}{\Delta t}}{-a Q_0 e^{-a\left(t+\frac{\Delta t}{2}\right)}} = 1 + \frac{e^{-c} - 1}{c \cdot e^{-\frac{c}{2}}} \quad (8)$$

where  $c = a \cdot \Delta t$ .
